# Supplementary material for: Respiratory syncytial virus exhibits differential tropism for distinct human placental cell types with Hofbauer cells acting as a permissive reservoir for infection
Source: PLoS One. 2019 Dec 2;14(12):e0225767. doi: 10.1371/journal.pone.0225767 (PMC6886783; doi:10.1371/journal.pone.0225767)
Supplement: S5 Table — (XLSX) [file pone.0225767.s005.xlsx]

## Sheet: Sheet1
	Placenta 24 HBC		Placenta 25 HBC		Placenta 26 HBC		Placenta 27 HBC		Placenta 28 HBC
24h	1	0.12086	1	0.19251	1	0.04268	1	0.11311	1	0.04051
48h	1.39844	0.18611	1.02268	0.02125	1.54327	0.01607	1.6007	0.05663	1.04333	0.08284
72h	2.81352	0.25026	0.82271	0.09148	1.28105	0.18124	1.29886	0.11089	1.72698	0.06293
96h	3.37722	0.37633	0.33156	0.00429	1.43429	0.07203	0.99659	0.00683	2.30081	0.17797
	100	12.086	100	19.251	100	4.268	100	11.311	100	4.051
	139.844	18.611	102.268	2.125	154.327	1.607	160.07	5.663	104.333	8.284
	281.352	25.026	82.271	9.148	128.105	18.124	129.886	11.089	172.698	6.293
	337.722	37.633	33.156	0.429	143.429	7.203	99.659	0.683	230.081	17.797
